# Supplementary material
Source: PubMed Central journal article supplement (PMC5700311)
Supplement: AAC.01250-17_zac012176698s1.pdf [file AAC.01250-17_zac012176698s1.pdf]

| Strain  | MIC 1 (mg/L) |     |     | MIC 2 (mg/L) |     |       | Missed by VIPcheck™ |          |
|---------|--------------|-----|-----|--------------|-----|-------|---------------------|----------|
|         | ITC          | VOR | POS | ITC          | VOR | POS   | Series 1            | Series 2 |
| V002-53 | >16          | 8   | 2   | >16          | 8   | 0.5   |                     |          |
| V062-02 | >16          | 0.5 | 0.5 | 16           | 4   | 0.5   |                     |          |
| V068-66 | >16          | 0.5 | 1   | >16          | 0.5 | 1     |                     |          |
| V073-70 | >16          | 16  | 1   | >16          | 8   | 0.5   |                     |          |
| V079-42 | >16          | 4   | 0.5 | >16          | 4   | 0.125 |                     |          |
| V114-57 | >16          | 4   | 1   | >16          | 4   | 0.5   |                     |          |
| V114-61 | >16          | 2   | 2   | >16          | 2   | 1     |                     |          |
| V114-72 | >16          | 0.5 | 0.5 | >16          | 0.5 | 0.25  |                     |          |
| V115-04 | >16          | 1   | 1   | >16          | 1   | 0.5   |                     |          |
| V115-80 | >16          | 0.5 | 1   | >16          | 1   | 0.5   |                     |          |
| V122-55 | >16          | 2   | 0.5 | 16           | 1   | 0.5   |                     |          |
| V126-37 | >16          | 8   | 2   | >16          | 8   | 0.5   |                     |          |
| V130-18 | >16          | 4   | 0.5 | 4            | 4   | 0.5   | 2/6                 | 2/6      |
| V137-54 | >16          | >16 | 1   | >16          | >16 | 0.5   |                     |          |
| V142-79 | >16          | 1   | 1   | >16          | 4   | 1     |                     |          |
| V145-41 | >16          | 2   | 0.5 | >16          | 1   | 1     |                     |          |
| V156-11 | >16          | 4   | 2   | >16          | 4   | 0.5   | 0/6                 | 3/6      |
| V158-01 | >16          | >16 | 2   | >16          | >16 | 0.5   |                     |          |
| V159-63 | >16          | 1   | 1   | >16          | 1   | 0.5   |                     |          |
| V159-73 | >16          | 2   | 2   | >16          | 2   | 0.5   | 1/6                 | 0/6      |

**Table S1. Characteristics of resistant *A. fumigatus* strains with unknown resistance mechanism.** Strain number, MIC results in duplicate and the results of the VIPcheck™ for the resistant strains without mutations in the *Cyp51A* gene are shown.
